# Supplementary material for: Room temperature interfacial reaction-directed synthesis of hierarchically porous ceria from a water-soluble precursor
Source: Royal Society of Chemistry journal article supplement (doi:10.1039/c5ta00664c), 2015-01-01
Supplement: c5ta00664c1.pdf [file c5ta00664c1.pdf]

## Electronic Supplementary Information

### Room Temperature Interfacial Reaction-Directed Synthesis of Hierarchically Porous Ceria from a Water-Soluble Precursor

Guozhu Chen,<sup>\*a</sup> Qihui Xu,<sup>a</sup> Yong Wang,<sup>a</sup> Guolong Song<sup>a</sup> and Weiliu Fan<sup>b</sup>

<sup>a</sup> School of Chemistry and Chemical Engineering, University of Jinan  
No.336 Nanxinzhuang west road, Jinan (P. R. China) Tel: (86)-531-82769181; E-mail: chm\_chengz@ujn.edu.cn

<sup>b</sup> School of Chemistry and Chemical Engineering, Shandong University  
No. 27 Shanda south road, Jinan (P. R. China)

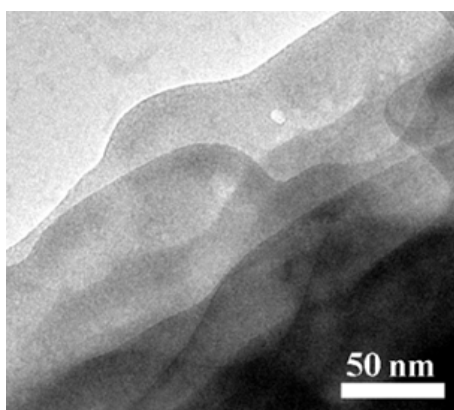

**Fig. S1** TEM image of  $\text{Ce}_2(\text{SO}_4)_3$  precursor under higher magnification.

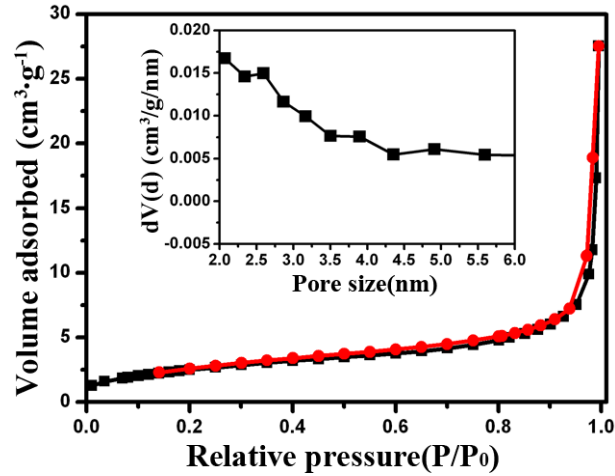

**Fig. S2** Nitrogen adsorption-desorption isotherm and the corresponding BJH pore size distribution for the C-ceria sample.

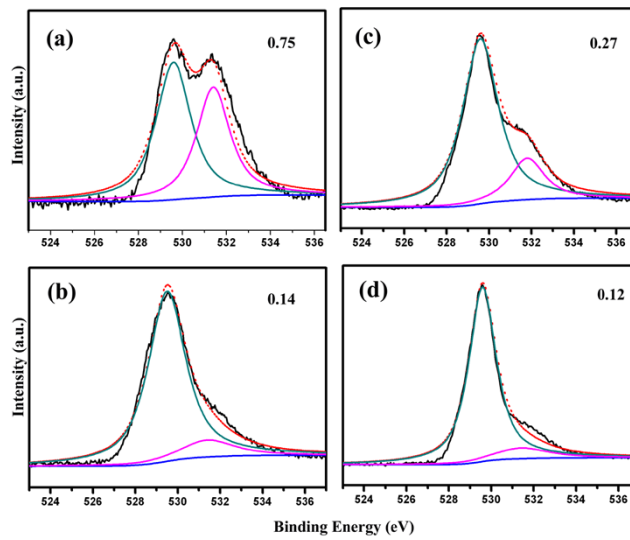

**Fig. S3** O 1s XPS spectra of I-ceria (a), C-ceria (b), I-ceria/Au (c) and C-ceria/Au (d). In the O 1s XPS spectra, the O1s spectra can be fitted into  $O_{\alpha}$  and  $O_{\beta}$ . The  $O_{\beta}$  peaks in I-ceria (a) and I-ceria/Au (c) are obviously stronger than those in C-ceria samples (b, d). The values in (a-d) figures are calculated from the area ratio ( $O_{\beta}/O_{\alpha}$ ).

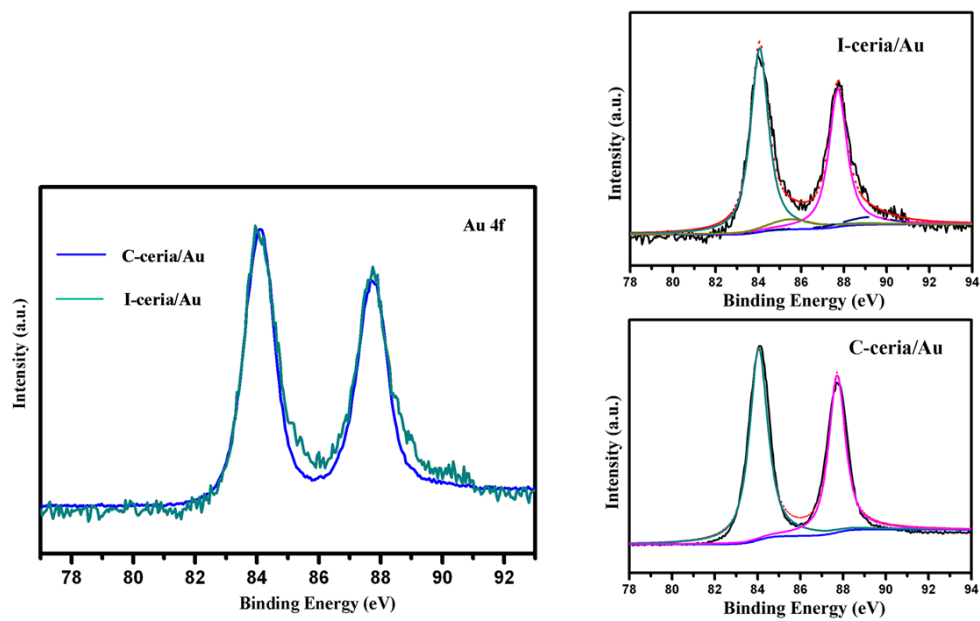

**Fig. S4** (Left) Au 4f XPS spectra of I-ceria/Au and C-ceria/Au after normalization, and (Right) after fitting analysis.
